# Supplementary material
Source: publisher site journal article supplement (https://www.dovepress.com/article/559695)
Supplement: Supplementary file 1 [file 559695%20Revised%20Supplementary%20Materials.docx]

**Table S1: The primer sequences used in the present study.**

| **Gene name** | **Primer Sequence (5'-3')** |
| --- | --- |
| GAPDH | Forward: AATCCCATCACCATCTTC |
| Reverse: AGGCTGTTGTCATACTTC |
| Tmsb10 | Forward: CCGGACATGGGGGAAATCG |
|  | Reverse: CCTGTTCAATGGTCTCTTTGGTC |
| Rpl29 | Forward: TGCAGGCCAACAATGCAAAG |
|  | Reverse: GGTTTGGACCTTAGGCTTCGG |
| Rps10 | Forward: ATGCCTAAGAAGAATCGGATTGC |
|  | Reverse: GGGCACATTTTTGTCTGCCA |
| Rpl13 | Forward: AGCCGGAATGGCATGATACTG |
|  | Reverse: ATCTCACTGTAGGGCACCTCA |
| Uba52 | Forward: CATCACTCTTGAGGTCGAGCC |
|  | Reverse: GTTTGCCCGCGAATATCAGC |
| Hspa1a | Forward: TGGTGCAGTCCGACATGAAG |
|  | Reverse: GCTGAGAGTCGTTGAAGTAGGC |
| Rgs5 | Forward: GGGTTGCCTGTGAGAATTACA |
|  | Reverse: TGAAGTGGTCAATGTTCACCTCT |
| Dnajb1 | Forward: TTCGACCGCTATGGAGAGGAA |
|  | Reverse: CACCGAAGAACTCAGCAAACA |
| Neat1 | Forward: CTTCCTCCCTTTAACTTATCCATTCAC |
|  | Reverse: CTCTTCCTCCACCATTACCAACAATAC |
| Hspa1b | Forward: GAGATCGACTCTCTGTTCGAGG |
|  | Reverse: GCCCGTTGAAGAAGTCCTG |
| Fn1 | Forward: ATGTGGACCCCTCCTGATAGT |
| Reverse: GCCCAGTGATTTCAGCAAAGG |
| Col1α1 | Forward: GCTCCTCTTAGGGGCCACT |
| Reverse: ATTGGGGACCCTTAGGCCAT |
| α-Sma | Forward: CCCAGACATCAGGGAGTAATGG |
| Reverse: TCTATCGGATACTTCAGCGTCA |

**Table S2: The antibodies used in the present study.**

| **Antibody** | **Experiment** |
| --- | --- |
| Fibronectin Rabbit mAb (1:1000, ABclonal, A12977)[1] | Western blot |
| Collagen I/COL1A1 Rabbit mAb (1:2000, ABclonal, A24112PM) [2] | Western blot |
| Alpha smooth muscle actin specific Monoclonal antibody (1:20000, PTG, 67735-1-Ig) [3] | Western blot |
| Anti-GAPDH Mouse mAb(1:1000, Servicebio, GB12002) [4] | Western blot |
| Collagen I/COL1A1 Rabbit mAb (1:200, ABclonal, A24112PM) [2]  Alpha smooth muscle actin specific Monoclonal antibody (1:200, PTG, 67735-1-Ig) [3] | Immunofluorescence Immunofluorescence |
| TMSB10 Polyclonal Antibody (1:200, Invitrogen, PA5-116041) [5]  Smad2 Rabbit pAb (1:2000, ABclonal, A0440) [6] | ImmunofluorescenceWestern blot |
| Phospho-Smad2-S465/S467 Rabbit mAb (1:5000, ABclonal, AP1342) [7] | Western blot |
| Smad3 Rabbit pAb (1:1000, ABclonal, A16913) [8] | Western blot |
| Phospho-Smad3-S423/S425 Rabbit mAb (1:1000, ABclonal, AP0727) [9] | Western blot |

**Table S3: Pairwise Comparisons with effect sizes and 95% confidence intervals.**

| **Data** | **Comparison** | **effect sizes** | **95% confidence intervals** |
| --- | --- | --- | --- |
| Figure3B-Tmsb10 | Control vs DN | -2.01 | [-3.64, -0.38] |
| Figure3B-Rpl29 | Control vs DN | -0.23 | [-1.52, 1.07] |
| Figure3B-Rps10 | Control vs DN | -1.75 | [-3.30, -0.19] |
| Figure3B-Rpl13 | Control vs DN | -1.14 | [-2.54, 0.27] |
| Figure3B-Uba52 | Control vs DN | -0.53 | [-1.84, 0.79] |
| Figure3B-Hspa1a | Control vs DN | -0.24 | [-1.53, 1.05] |
| Figure3B-Rgs5 | Control vs DN | 2 | [0.37, 3.63] |
| Figure3B-Dnajb1 | Control vs DN | 0.15 | [-1.14, 1.44] |
| Figure3B-Neat1 | Control vs DN | -0.07 | [-1.36, 1.21] |
| Figure3B-Hspa1b | Control vs DN | -0.05 | [-1.33, 1.24] |
| Figure 5A | Control vs DN | -4.50 | [-7.09, -1.92] |
| Control vs DN+shTMSB10 | -1.18 | [-2.59, 0.23] |
| DN vs DN+shTMSB10 | 3.25 | [1.18, 5.32] |
| Figure 5B | Control vs DN | -2.02 | [-3.65, -0.38] |
| Control vs DN+shTMSB10 | 0.31 | [-0.99, 1.60] |
| DN vs DN+shTMSB10 | 1.94 | [0.33, 3.55] |
| Figure 5C | Control vs DN | -2.57 | [-4.39, -0.76] |
| Control vs DN+shTMSB10 | 0.03 | [-1.26, 1.32] |
| DN vs DN+shTMSB10 | 2.19 | [0.50, 3.87] |
| Figure 5D | Control vs DN | -1.81 | [-3.38, -0.24] |
| Control vs DN+shTMSB10 | 0.33 | [-0.97, 1.62] |
| DN vs DN+shTMSB10 | 2.00 | [0.38, 3.63] |
| Figure 5H | Control vs DN | -6.74 | [-13.73, 0.25] |
| Control vs DN+shTMSB10 | -1.68 | [-4.49, 1.12] |
| DN vs DN+shTMSB10 | 4.42 | [-0.48, 9.31] |
| Figure 5I | Control vs DN | -13.49 | [-26.93, -0.06] |
| Control vs DN+shTMSB10 | -3.95 | [-8.44, 0.54] |
| DN vs DN+shTMSB10 | 5.91 | [-0.32, 12.14] |
| Figure 5J | Control vs DN | -10.33 | [-20.71, -0.06] |
| Control vs DN+shTMSB10 | -3.57 | [-7.74, 0.60] |
| DN vs DN+shTMSB10 | 7.63 | [-0.20, 15.46] |
| Figure 6B | Control vs DN | -5.36 | [-8.12, -2.59] |
| Control vs DN+shTMSB10 | -1.64 | [-3.39, 0.11] |
| DN vs DN+shTMSB10 | 3.09 | [0.90, 5.27] |
| Figure 6D | Control vs DN | -6.44 | [-9.90, -2.99] |
| Control vs DN+shTMSB10 | -2.39 | [-4.14, -0.64] |
| DN vs DN+shTMSB10 | 3.40 | [1.27, 5.53] |
| Figure 6E | Control vs DN | -5.74 | [-8.81, -2.68] |
| Control vs DN+shTMSB10 | -2.60 | [-4.42, -0.79] |
| DN vs DN+shTMSB10 | 3.13 | [1.00, 5.25] |
| Figure 7A | NC vs HG | -4.29 | [-6.65, -1.93] |
| NC vs siTMSB10 | 2.02 | [0.43, 3.61] |
| NC vs HG+siTMSB10 | -0.5 | [-1.91, 0.90] |
| HG vs HG+siTMSB10 | 3.92 | [1.66, 6.18] |
| HG vs siTMSB10 | 6.22 | [3.34, 9.10] |
| siTMSB10 vs HG+siTMSB10 | -2.32 | [-4.12, -0.52] |
| Figure 7B | NC vs HG | -2.41 | [-4.17, -0.65] |
| NC vs siTMSB10 | 2.3 | [0.58, 4.03] |
| NC vs HG+siTMSB10 | -0.45 | [-1.76, 0.85] |
| HG vs HG+siTMSB10 | 1.7 | [0.16, 3.24] |
| HG vs siTMSB10 | 3.87 | [1.56, 6.19] |
| siTMSB10 vs HG+siTMSB10 | -2.19 | [-3.88, -0.50] |
| Figure 7C | NC vs HG | -2.56 | [-4.38, -0.75] |
| NC vs siTMSB10 | 1.28 | [-0.16, 2.71] |
| NC vs HG+siTMSB10 | -0.53 | [-1.85, 0.78] |
| HG vs HG+siTMSB10 | 1.84 | [0.26, 3.42] |
| HG vs siTMSB10 | 3.32 | [1.22, 5.41] |
| siTMSB10 vs HG+siTMSB10 | -1.55 | [-3.05, -0.05] |
| Figure 7D | NC vs HG | -2.22 | [-3.94, -0.49] |
| NC vs siTMSB10 | 1.43 | [0.00, 2.86] |
| NC vs HG+siTMSB10 | -0.26 | [-1.58, 1.07] |
| HG vs HG+siTMSB10 | 1.67 | [0.10, 3.23] |
| HG vs siTMSB10 | 3.38 | [1.30, 5.46] |
| siTMSB10 vs HG+siTMSB10 | -1.64 | [-3.16, -0.12] |
| Figure 7F-FN1 | NC vs HG | -8.82 | [-17.91, 0.26] |
| NC vs siTMSB10 | 1.23 | [-2.69, 5.15] |
| NC vs HG+siTMSB10 | -3.63 | [-8.06, 0.80] |
| HG vs HG+siTMSB10 | 4.8 | [-0.29, 9.89] |
| HG vs siTMSB10 | 10.05 | [2.53, 17.57] |
| siTMSB10 vs HG+siTMSB10 | -5.06 | [-10.12, 0.00] |
| Figure 7F- Col1a1 | NC vs HG | -11.18 | [-22.93, 0.58] |
| NC vs siTMSB10 | 2.97 | [-1.62, 7.56] |
| NC vs HG+siTMSB10 | -4.41 | [-9.10, 0.28] |
| HG vs HG+siTMSB10 | 6.64 | [0.28, 13.00] |
| HG vs siTMSB10 | 14.15 | [4.46, 23.83] |
| siTMSB10 vs HG+siTMSB10 | -5.5 | [-10.99, -0.02] |
| Figure 7F-  a-SMA | NC vs HG | -5.42 | [-11.03, 0.19] |
| NC vs siTMSB10 | 3.05 | [-0.98, 7.08] |
| NC vs HG+siTMSB10 | -0.98 | [-4.17, 2.21] |
| HG vs HG+siTMSB10 | 3.34 | [-0.57, 7.25] |
| HG vs siTMSB10 | 8.16 | [1.78, 14.55] |
| siTMSB10 vs HG+siTMSB10 | -4.01 | [-8.25, 0.23] |
| Figure 7H | NC vs HG | -5.19 | [-7.95, -2.43] |
| NC vs siTMSB10 | 3.07 | [0.92, 5.22] |
| NC vs HG+siTMSB10 | -0.75 | [-2.41, 0.90] |
| HG vs HG+siTMSB10 | 3.67 | [1.39, 5.95] |
| HG vs siTMSB10 | 7.7 | [4.55, 10.85] |
| siTMSB10 vs HG+siTMSB10 | -3.47 | [-5.68, -1.25] |
| Figure 7J-  SMAD2 | NC vs HG | -5.53 | [-11.20, 0.14] |
| NC vs siTMSB10 | 3.45 | [-0.64, 7.53] |
| NC vs HG+siTMSB10 | -0.21 | [-3.34, 2.91] |
| HG vs HG+siTMSB10 | 2.56 | [-1.14, 6.26] |
| HG vs siTMSB10 | 8.42 | [1.89, 14.94] |
| siTMSB10 vs HG+siTMSB10 | -3.68 | [-7.53, 0.17] |
| Figure 7J-  SMAD3 | NC vs HG | -6.09 | [-12.03, -0.14] |
| NC vs siTMSB10 | 4.01 | [-0.09, 8.11] |
| NC vs HG+siTMSB10 | -1.53 | [-4.79, 1.73] |
| HG vs HG+siTMSB10 | 2.86 | [-0.81, 6.53] |
| HG vs siTMSB10 | 9.9 | [2.60, 17.20] |
| siTMSB10 vs HG+siTMSB10 | -3.91 | [-7.89, 0.07] |

**Refrence**

[1] ABclonal. Fibronectin Rabbit mAb (A12977) Datasheet. Available online: https://www.abclonal.com/catalog-antibodies/FibronectinRabbitmAb/A12977 (accessed on 9 November 2025).

[2] ABclonal. Collagen I (COL1A1) Rabbit Polyclonal Antibody (A24112PM) Datasheet. Available online: https://www.abclonal.com/catalog-antibodies/CollagenICOL1A1RabbitPolymAb/A24112PM (accessed on 9 November 2025).

[3] Proteintech. Smooth Muscle Actin (Alpha-Smooth Muscle Actin) Mouse mAb (67735-1-Ig) Datasheet. Available online: https://www.ptgcn.com/products/smooth-muscle-actin-specific-Antibody-67735-1-Ig.htm (accessed on 9 November 2025).

[4]Servicebio.GAPDH(GB588) Datasheet. Available online: https://www.servicebio.cn/goodsdetail?id=588 (accessed on 9 November 2025).

[5] Thermo Fisher Scientific. TMSB10 Antibody (PA5-116041) Datasheet. Available online: https://www.thermofisher.cn/cn/zh/antibody/product/TMSB10-Antibody-Polyclonal/PA5-116041 (accessed on 9 November 2025).

[6] ABclonal. Smad2 Rabbit pAb (A0440) Datasheet. Available online: https://www.abclonal.com/catalog-antibodies/Smad2RabbitpAb/A0440 (accessed on 9 November 2025).

[7] ABclonal. Phospho-Smad2 (S465/S467) Rabbit mAb (AP1342) Datasheet. Available online: https://www.abclonal.com/catalog-antibodies/PhosphoSmad2S465S467RabbitmAb/AP1342 (accessed on 9 November 2025).

[8] ABclonal. Smad3 Rabbit pAb (A16913) Datasheet. Available online: https://www.abclonal.com/catalog-antibodies/Smad3RabbitpAb/A16913 (accessed on 9 November 2025).

[9] ABclonal. Phospho-Smad3 (S423/S425) Rabbit mAb (AP0727) Datasheet. Available online: https://www.abclonal.com/catalog-antibodies/PhosphoSmad3S423S425RabbitmAb/AP0727 (accessed on 9 November 2025).
